# Supplementary material for: Muscle Involvement in a Large Cohort of Pediatric Patients with Genetic Diagnosis of Mitochondrial Disease
Source: PubMed Central journal article supplement (PMC6352184; doi:10.3390/jcm8010068), 2019-01-10
Supplement: jcm-08-00068-s001.pdf [file jcm-08-00068-s001.pdf]

**Table S1.** Main clinical, biochemical, histopathological and molecular data in the entire cohort of patients. Positive histopathology was considered when patients presented with COX negative, RRF or blue fibers. Myopathy was present when one of the following signs were present: ophthalmoplegia, myopathic facies, weakness, exercise intolerance, rhabdomyolysis or myopathic EMG. mtDNA depletions were detected in tissues, mainly in muscle. In brackets, we quoted the references where some of our patients were previously published [30-39]. In the column “Role in OXPHOS”, (1) correspond to genes with a primary role specific to OXPHOS biogenesis and (2) to genes with a secondary impact on OXPHOS biogenesis as well as other cellular functions, as reported by Frazier et al [19].

| Case | Age (onset) | Sex | Miopathy | Histopathology | Genetic diagnosis                                          | Genetic Group | Clinical phenotype                   | Role in OXPHOS [19]               |
|------|-------------|-----|----------|----------------|------------------------------------------------------------|---------------|--------------------------------------|-----------------------------------|
| 1    | 0.01        | M   |          | Positive       | AGK:c.[IVS8+1G>A];[IVS8+1G>A]                              | nDNA          | SENGERS syndrome                     | Protein import/processing (2)     |
| 2    | 0.5         | F   | No       | Negative       | arr[hg19] 5q14.3(85425299-91114671)x1 (COX7 gene deletion) | nDNA          | Encephalopathy                       | OXPHOS subunit (1)                |
| 3    | 11          | M   | No       | Negative       | BCS1L:c.[166C>T];[205C>T]                                  | nDNA          | Leigh syndrome                       | OXPHOS Assembly factors (1)       |
| 4    | 3           | F   | Yes      | Positive       | Common mtDNA deletion                                      | mtDNA         | CPEO                                 | OXPHOS subunit (1)                |
| 5    | 15          | M   | No       | Positive       | Common mtDNA deletion (62%) [30]                           | mtDNA         | Kearns-Sayre                         | OXPHOS subunit (1)                |
| 6    | 0.01        | F   | No       | Negative       | DNM1L:c.[1337G>T];[1337=] [30]                             | nDNA          | Encephalopathy                       | OXPHOS subunit (1)                |
| 7    | 0.08        | M   | No       | Negative       | ECHS1:c.[740C>T];[146T>C]                                  | nDNA          | Leigh syndrome                       | OXPHOS subunit (1)                |
| 8    | 7           | F   | No       | Negative       | FARS2:c.[1256G>A];[(672+1_673-1)_(904+1_905-1)del]         | nDNA          | Encephalopathy/Spastic paraparesis   | Mitochondrial morphology (2)      |
| 9    | 0.01        | M   | No       |                | FBXL4:c.[851delC];[851delC]                                | nDNA          | Mitochondrial DNA depletion syndrome | Metabolism of toxic compounds (2) |
| 10   | 0.16        | F   | No       | Positive       | GFM1:c.[1401delA];[2011C>T] [32]                           | nDNA          | Encephalopathy                       | Mitochondrial tRNA biogenesis (1) |

|    |      |   |     |          |                                                                     |       |                     |                                   |
|----|------|---|-----|----------|---------------------------------------------------------------------|-------|---------------------|-----------------------------------|
| 11 | 0.18 | M | No  |          | HIBCH:c.[517+1G>A];[353T>C]                                         | nDNA  | Encephalopathy      | Unclear function                  |
| 12 | 0.16 | M | No  |          | NDUFAF2:c.[(?_-127)_(217+1_218-1)del)];[(?_-127)_(217+1_218-1)del]] | nDNA  | Encephalopathy      | Translation (1)                   |
| 13 | 0.16 | F | No  | Positive | KARS:c.[650G>A];[1709C>G]                                           | nDNA  | Encephalopathy      | Metabolism of toxic compounds (2) |
| 14 | 6    | M | No  | Positive | MT-ATP6                                                             | mtDNA | NARP                | OXPPOS Assembly factors (1)       |
| 15 | 2    | F | Yes | Positive | MT-ATP6:m.8573G>A                                                   | mtDNA | Leigh/NARP          | Mitochondrial tRNA biogenesis (1) |
| 16 | 0.01 | F | No  | Negative | MT-ATP6:m.8993T>G                                                   | mtDNA | NARP                | OXPPOS subunit (1)                |
| 17 | 0.2  | M | No  | Negative | MT-ATP6:m.8993T>G                                                   | mtDNA | NARP                | OXPPOS subunit (1)                |
| 18 | 0.3  | M | No  | Negative | MT-ATP6:m.8993T>G                                                   | mtDNA | Encephalopathy      | OXPPOS subunit (1)                |
| 19 | 0.3  | F | No  | Negative | MT-ATP6:m.8993T>G                                                   | mtDNA | NARP                | OXPPOS subunit (1)                |
| 20 | 1    | F | No  | Negative | MT-ATP6:m.8993T>G                                                   | mtDNA | Leigh syndrome      | OXPPOS subunit (1)                |
| 21 | 1    | F | Yes | Negative | MT-ATP6:m.8993T>G                                                   | mtDNA | Leigh syndrome      | OXPPOS subunit (1)                |
| 22 | 2    | M | No  | Negative | MT-ATP6:m.8993T>G                                                   | mtDNA | Leigh syndrome      | OXPPOS subunit (1)                |
| 23 | 2    | F |     | Negative | MT-ATP6:m.8993T>G                                                   | mtDNA | NARP                | OXPPOS subunit (1)                |
| 24 | 1    | M | Yes |          | MT-ATP6:m.9176T>C                                                   | mtDNA | Leigh/NARP          | OXPPOS subunit (1)                |
| 25 | 0.01 | F |     |          | MT-CO1:m.7258T>C                                                    | mtDNA | LEBER OPTIC ATROPHY | OXPPOS subunit (1)                |
| 26 | 3    | F | Yes | Positive | mtDNA deletion (11041 bp)                                           | mtDNA | Kearns-Sayre        | OXPPOS subunit (1)                |
| 27 | 3    | M | Yes | Positive | mtDNA deletion (4120 bp) [30]                                       | mtDNA | Kearns-Sayre        | OXPPOS subunit (1)                |
| 28 | 9    | F | Yes | Positive | mtDNA deletion (60%)                                                | mtDNA | Kearns-Sayre        | OXPPOS subunit (1)                |
| 29 | 4    | M | Yes | Positive | mtDNA deletion (600 bp)                                             | mtDNA | Kearns-Sayre        | OXPPOS subunit (1)                |
| 30 | 8    | M |     | Positive | mtDNA deletion (6700 bp) [30]                                       | mtDNA | Kearns-Sayre        | OXPPOS subunit (1)                |
| 31 | 9    | M |     | Positive | mtDNA deletion (7663 bp)                                            | mtDNA | Kearns-Sayre        | OXPPOS subunit (1)                |
| 32 | 9    | F | Yes | Positive | mtDNA deletion (77%; 2434 bp) [30]                                  | mtDNA | Kearns-Sayre        | OXPPOS subunit (1)                |
| 33 | 16   | M | Yes |          | mtDNA deletion (80%)                                                | mtDNA | Kearns-Sayre        | OXPPOS subunit (1)                |
| 34 | 1    | M | No  |          | mtDNA deletion (90%; 3600 bp)                                       | mtDNA | Pearson             | OXPPOS subunit (1)                |

|    |      |   |     |          |                                     |       |                                      |                                   |
|----|------|---|-----|----------|-------------------------------------|-------|--------------------------------------|-----------------------------------|
| 35 | 0.4  | M |     |          | mtDNA depletion (70%)               | nDNA  | Myopathy                             | Not solved                        |
| 36 | 0.5  | F | No  | Negative | mtDNA depletion (70%)               | nDNA  | Mitochondrial DNA depletion syndrome | Not solved                        |
| 37 | 1    | F |     | Negative | mtDNA depletion (70%)               | nDNA  | Encephalopathy                       | Not solved                        |
| 38 | 1    | F | Yes | Positive | mtDNA depletion (70%)               | nDNA  | Encephalopathy                       | Not solved                        |
| 39 | 0.01 | M |     |          | mtDNA depletion (72%)               | nDNA  | Encephalopathy                       | Not solved                        |
| 40 | 0.02 | F | No  |          | mtDNA depletion (75%)               | nDNA  | Mitochondrial DNA depletion syndrome | Not solved                        |
| 41 | 2    | M | No  |          | mtDNA depletion (80%)               | nDNA  | Mitochondrial DNA depletion syndrome | Not solved                        |
| 42 | 0.1  | M |     | Negative | mtDNA depletion (84%)               | nDNA  | Myopathy                             | Not solved                        |
| 43 | 2    | M |     | Positive | mtDNA depletion (90%)               | nDNA  | Mitochondrial DNA depletion syndrome | Not solved                        |
| 44 | 11   | M |     |          | MT-ND1:m.3460G>A                    | mtDNA | LEBER OPTIC ATROPHY                  | OXPPOS subunit (1)                |
| 45 | 14   | M | No  |          | MT-ND1:m.3460G>A                    | mtDNA | LEBER OPTIC ATROPHY                  | OXPPOS subunit (1)                |
| 46 | 4    | M |     | Negative | MT-ND1:m.3547A>G; MT-ND5:m.11177C>T | mtDNA | NARP                                 | OXPPOS subunit (1)                |
| 47 | 5    | M |     |          | MT-ND1:m.4216T>C                    | mtDNA | Optic atrophy syndrome               | OXPPOS subunit (1)                |
| 48 | 7    | M | Yes |          | MT-ND5:m.13513G>A                   | mtDNA | Leigh/NARP                           | OXPPOS subunit (1)                |
| 49 | 14   | F | No  | Positive | MT-ND5:m.13513G>A                   | mtDNA | MELAS                                | OXPPOS subunit (1)                |
| 50 | 11   | M | No  |          | MT-ND6:m.14495A>G                   | mtDNA | LEBER OPTIC ATROPHY                  | OXPPOS subunit (1)                |
| 51 | 13   | F | Yes | Positive | MT-TA:m.5624T>C                     | mtDNA | Myopathy                             | Mitochondrial tRNA biogenesis (1) |
| 52 | 8    | M | No  |          | MT-TK:m.8344A>G (90%)               | mtDNA | MERRF                                | Mitochondrial tRNA biogenesis (1) |
| 53 | 5    | F |     | Negative | MT-TK:m.8363G>A [22]                | mtDNA | MERRF                                | Mitochondrial tRNA biogenesis (1) |
| 54 | 2    | M | Yes | Positive | MT-TL1:m.3243A>G                    | mtDNA | MELAS                                | Mitochondrial tRNA biogenesis (1) |

|    |      |   |     |          |                                    |       |                              |                                   |
|----|------|---|-----|----------|------------------------------------|-------|------------------------------|-----------------------------------|
| 55 | 2    | F | Yes |          | MT-TL1:m.3243A>G                   | mtDNA | MELAS                        | Mitochondrial tRNA biogenesis (1) |
| 56 | 4    | M | Yes | Positive | MT-TL1:m.3243A>G                   | mtDNA | MELAS                        | Mitochondrial tRNA biogenesis (1) |
| 57 | 5    | M | Yes |          | MT-TL1:m.3243A>G                   | mtDNA | MELAS                        | Mitochondrial tRNA biogenesis (1) |
| 58 | 6    | F | No  |          | MT-TL1:m.3243A>G                   | mtDNA | MELAS                        | Mitochondrial tRNA biogenesis (1) |
| 59 | 6    | M | Yes |          | MT-TL1:m.3243A>G                   | mtDNA | MELAS                        | Mitochondrial tRNA biogenesis (1) |
| 60 | 10   | M | No  | Positive | MT-TL1:m.3243A>G                   | mtDNA | MELAS                        | Mitochondrial tRNA biogenesis (1) |
| 61 | 13   | M | No  | Positive | MT-TL1:m.3243A>G [22]              | mtDNA | MELAS                        | Mitochondrial tRNA biogenesis (1) |
| 62 | 10   | F | Yes |          | MT-TL1:m.3252A>G                   | mtDNA | MELAS                        | Mitochondrial tRNA biogenesis (1) |
| 63 | 15   | F |     |          | MT-TS2:m.12237delC                 | mtDNA | MERRF/MELAS OVERLAP SYNDROME | Mitochondrial tRNA biogenesis (1) |
| 64 | 2    | M | No  | Positive | MT-TV:m.1643A>G                    | mtDNA | Encephalopathy               | Mitochondrial tRNA biogenesis (1) |
| 65 | 3    | F |     | Negative | Multiple mtDNA deletions           | nDNA  | Encephalopathy               | OXPPOS subunit (1)                |
| 66 | 5    | M | Yes | Negative | Multiple mtDNA deletions           | nDNA  | CPEO                         | OXPPOS subunit (1)                |
| 67 | 2    | M | Yes |          | NDUFS2:c.[422A>G];[?]              | nDNA  | Leigh syndrome               | OXPPOS subunit (1)                |
| 68 | 6    | F | No  |          | NDUFS2:c.[422A>G];[?]              | nDNA  | Leigh syndrome               | OXPPOS subunit (1)                |
| 69 | 0.5  | F | No  | Negative | NDUFS4:c.[291delG];[291delG] [33]  | nDNA  | Leigh syndrome               | OXPPOS subunit (1)                |
| 70 | 1    | F | No  |          | NFU1:c.[545+5G>A];[622G>T] [34]    | nDNA  | Encephalopathy               | Fe-S cluster biogenesis (2)       |
| 71 | 0.58 | F | Yes | Positive | OPA1:c.[1710T>G];[1710=]           | nDNA  | Optic atrophy plus syndrome  | Mitochondrial morphology (2)      |
| 72 | 0.13 | F | Yes | Positive | OXA1L:c.[500_507dup];[620G>T] [35] | nDNA  | Myopathy                     | OXPPOS Assembly factors (1)       |

|    |      |   |     |          |                                       |      |                                                          |                                   |
|----|------|---|-----|----------|---------------------------------------|------|----------------------------------------------------------|-----------------------------------|
| 73 | 2    | M | No  | Negative | PDHA1:c.[1143_1144ins24]              | nDNA | Leigh syndrome                                           | Krebs cycle and metabolism (2)    |
| 74 | 5    | F | No  |          | PDHA1:c.[409G>C];[409=]               | nDNA | Encephalopathy                                           | Krebs cycle and metabolism (2)    |
| 75 | 0.33 | F | No  | Negative | PDHA1:c.[498C>T];[498=]               | nDNA | Leigh syndrome                                           | Krebs cycle and metabolism (2)    |
| 76 | 1    | M | Yes |          | PDHA1:c.[787C>G]                      | nDNA | Leigh syndrome                                           | Krebs cycle and metabolism (2)    |
| 77 | 1    | M | Yes | Negative | PDHA1:c.[832G>A] [34]                 | nDNA | Encephalopathy                                           | Krebs cycle and metabolism (2)    |
| 78 | 1    | M | Yes | Positive | PDHB:c.[301A>G];[42+1G>A] [36]        | nDNA | Leigh syndrome                                           | Krebs cycle and metabolism (2)    |
| 79 | 1    | F | Yes | Negative | POLG:c.[2591A>G];[3649G>C] [8]        | nDNA | Encephalopathy                                           | Mitochondrial DNA homeostasis (1) |
| 80 | 1    | M | No  | Negative | POLG:c.[911T>G];[2663G>A]             | nDNA | Encephalopathy                                           | Mitochondrial DNA homeostasis (1) |
| 81 | 11   | M | Yes | Positive | POLG:c.[911T>G];[911T>G]              | nDNA | Myopathy                                                 | Mitochondrial DNA homeostasis (1) |
| 82 | 0.02 | M | No  | Negative | PUS1:c.[1236+7G>A];[1236+7G>A]        | nDNA | Leigh syndrome                                           | Mitochondrial tRNA biogenesis (1) |
| 83 | 2    | F | No  |          | RARS2:c.[442A>G];[34C>T]              | nDNA | Ataxia                                                   | Mitochondrial tRNA biogenesis (1) |
| 84 | 1    | M | No  | Negative | SLC19A3:c.[1079dupT];[980-14A>G] [37] | nDNA | Leigh syndrome - Biotin responsive basal ganglia disease | Metabolite transport (2)          |
| 85 | 4    | M | No  |          | SLC19A3:c.[68G>T];[68G>T] [37]        | nDNA | Leigh syndrome - Biotin responsive basal ganglia disease | Metabolite transport (2)          |
| 86 | 4    | F | No  |          | SLC19A3:c.[74dupT];[980-14A>G] [37]   | nDNA | Leigh syndrome - Biotin responsive basal ganglia disease | Metabolite transport (2)          |

|    |    |   |     |          |                                           |      |                                                          |                          |
|----|----|---|-----|----------|-------------------------------------------|------|----------------------------------------------------------|--------------------------|
| 87 | 13 | M | Yes |          | SLC19A3:c.[74dupT];[980-14A>G] [37]       | nDNA | Leigh syndrome - Biotin responsive basal ganglia disease | Metabolite transport (2) |
| 88 | 2  | F | No  | Negative | SUCLA2:c.[1048G>A];[1049G>T] [38]         | nDNA | Leigh syndrome                                           | Nucleotide pools (1)     |
| 89 | 5  | M | Yes |          | TAZ:c.[94A>C]                             | nDNA | Barth syndrome                                           | Lipid modification (2)   |
| 90 | 2  | M | Yes | Positive | TK2: c.[276dupA];[730_732delAAG]          | nDNA | Myopathy                                                 | Nucleotide pools (1)     |
| 91 | 1  | M | Yes |          | TK2:c.[360_361delGCinsAA];[575G>A] [39]   | nDNA | Myopathy                                                 | Nucleotide pools (1)     |
| 92 | 2  | M | Yes | Positive | TK2:c.[360_361delinsAA];[360_361delinsAA] | nDNA | Miopathy                                                 | Nucleotide pools (1)     |
| 93 | 1  | M |     | Positive | TK2:c.[388C>T];[623A>G]                   | nDNA | Miopathy                                                 | Nucleotide pools (1)     |
| 94 | 3  | M | Yes | Positive | TK2:c.[388C>T];[633A>G]                   | nDNA | Myopathy                                                 | Nucleotide pools (1)     |
| 95 | 1  | F | Yes |          | TK2:c.[602-6del];[529G>T]                 | nDNA | Miopathy                                                 | Nucleotide pools (1)     |
